# Supplementary material for: Autonomous and efficient large-scale snow avalanche monitoring with an Unmanned Aerial System (UAS)
Source: Copernicus journal article supplement (doi:10.5194/nhess-26-411-2026), 2026-01-22
Supplement: Supplementary file 2 [file ActivePlanning_partial_report.pdf › Supplementary/ActivePlanning_partial_report.pdf]

# Active Planning Partial dataset

Processing Report  
29 August 2025

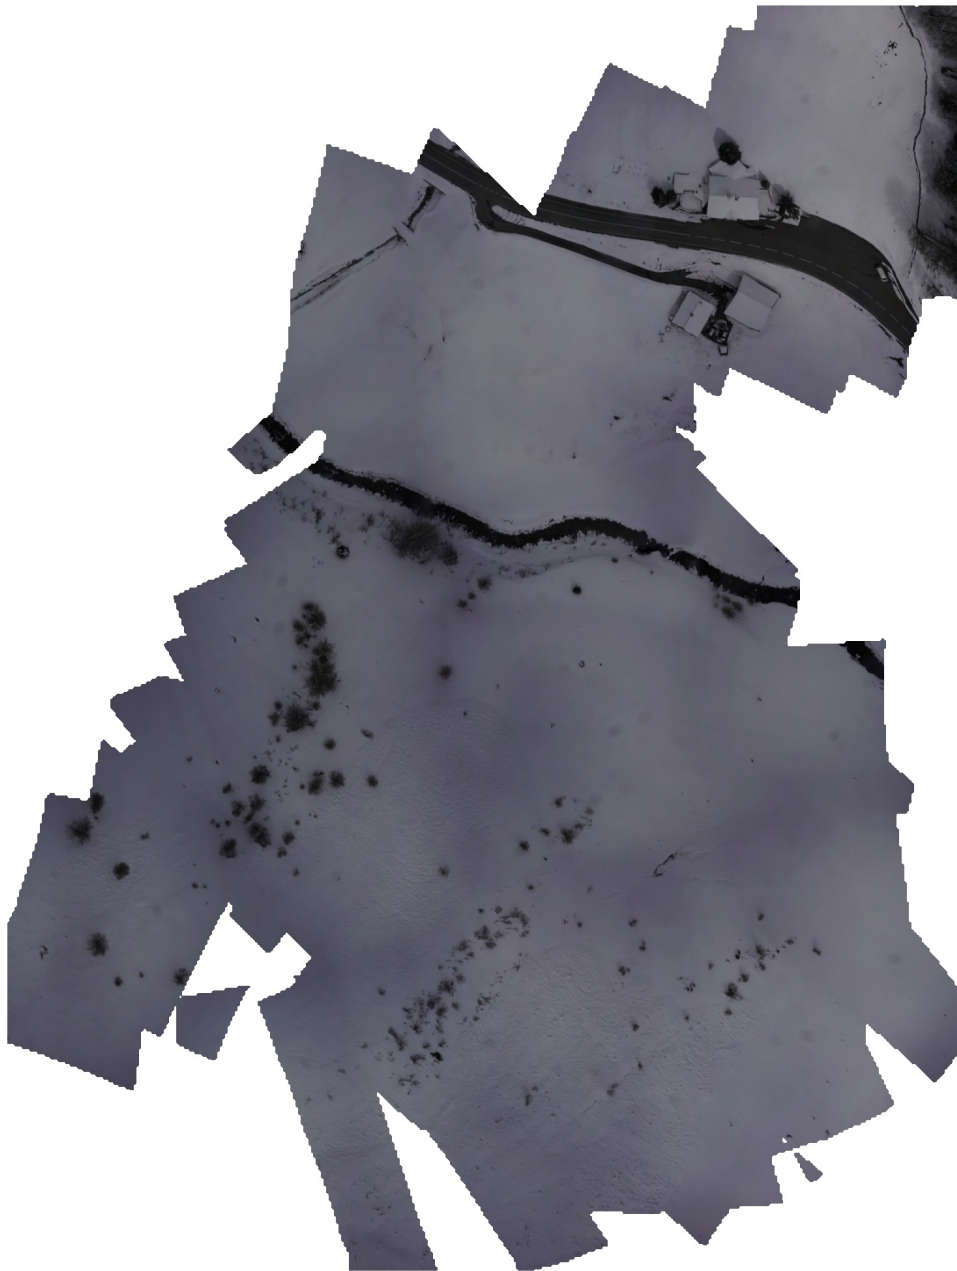

# Survey Data

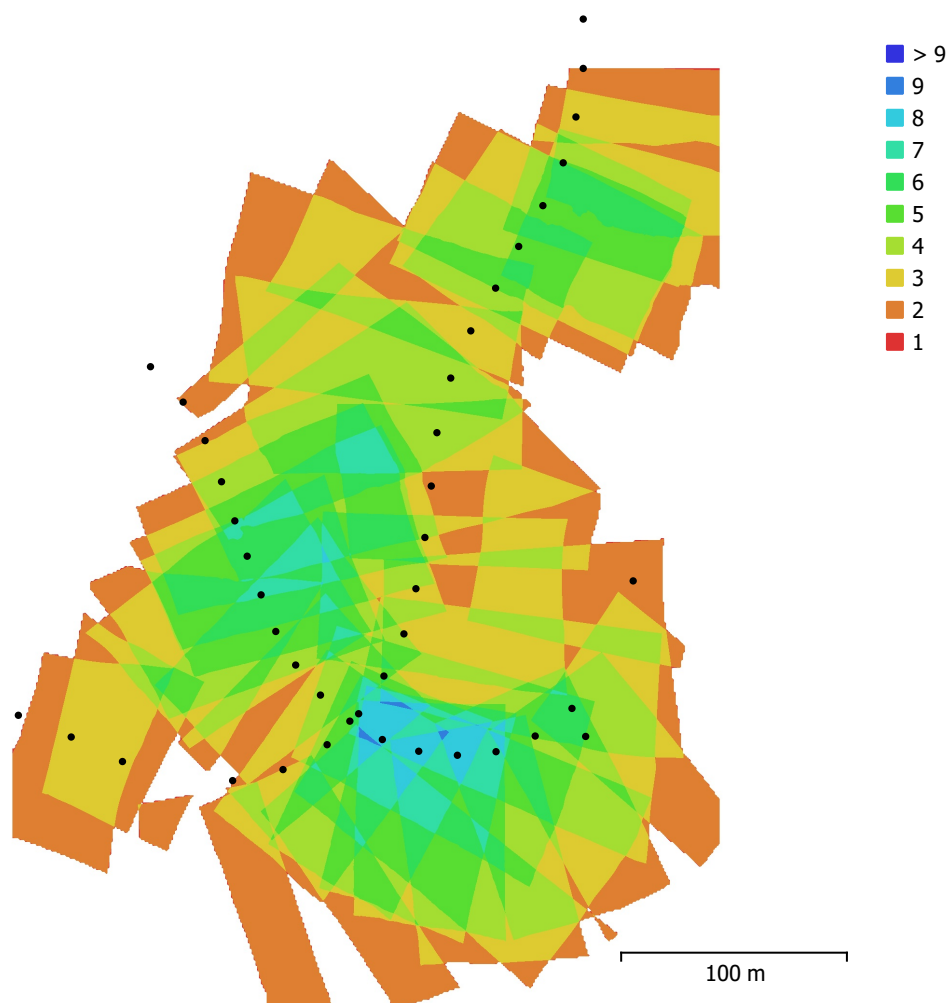

Fig. 1. Camera locations and image overlap.

|                    |                        |                     |        |
|--------------------|------------------------|---------------------|--------|
| Number of images:  | 67                     | Camera stations:    | 41     |
| Flying altitude:   | 107 m                  | Tie points:         | 28,404 |
| Ground resolution: | 1.11 cm/pix            | Projections:        | 80,151 |
| Coverage area:     | 0.0811 km <sup>2</sup> | Reprojection error: | 2 pix  |

| Camera Model             | Resolution  | Focal Length | Pixel Size     | Precalibrated |
|--------------------------|-------------|--------------|----------------|---------------|
| ILCE-7RM4, FE 35mm F2... | 9504 x 6336 | 35 mm        | 3.79 x 3.79 μm | No            |

Table 1. Cameras.

# Camera Calibration

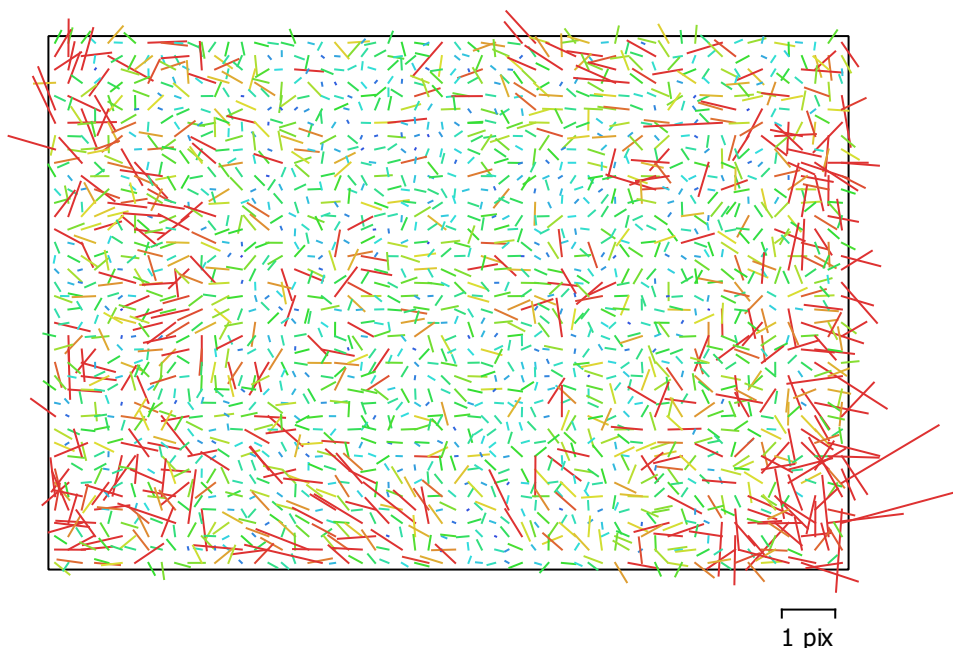

Fig. 2. Image residuals for ILCE-7RM4, FE 35mm F2.8 ZA (35mm).

## ILCE-7RM4, FE 35mm F2.8 ZA (35mm)

67 images

|       |             |              |                |
|-------|-------------|--------------|----------------|
| Type  | Resolution  | Focal Length | Pixel Size     |
| Frame | 9504 x 6336 | 35 mm        | 3.79 x 3.79 μm |

|    | Value        | Error   | F    | Cx    | Cy    | K1    | K2    | K3    | P1    | P2    |
|----|--------------|---------|------|-------|-------|-------|-------|-------|-------|-------|
| F  | 9663         | 2.1     | 1.00 | -0.31 | 0.42  | 0.29  | -0.02 | -0.09 | -0.09 | 0.40  |
| Cx | -35.5273     | 0.74    |      | 1.00  | -0.03 | -0.11 | 0.04  | -0.02 | 0.64  | 0.06  |
| Cy | -40.2525     | 0.98    |      |       | 1.00  | 0.13  | 0.02  | -0.08 | -0.14 | 0.86  |
| K1 | 0.0618007    | 0.00036 |      |       |       | 1.00  | -0.92 | 0.82  | -0.12 | 0.18  |
| K2 | -0.277702    | 0.0023  |      |       |       |       | 1.00  | -0.98 | 0.02  | -0.00 |
| K3 | 0.0664887    | 0.0046  |      |       |       |       |       | 1.00  | -0.00 | -0.06 |
| P1 | -0.000785458 | 2e-05   |      |       |       |       |       |       | 1.00  | -0.13 |
| P2 | -0.000923593 | 2.9e-05 |      |       |       |       |       |       |       | 1.00  |

Table 2. Calibration coefficients and correlation matrix.

# Camera Locations

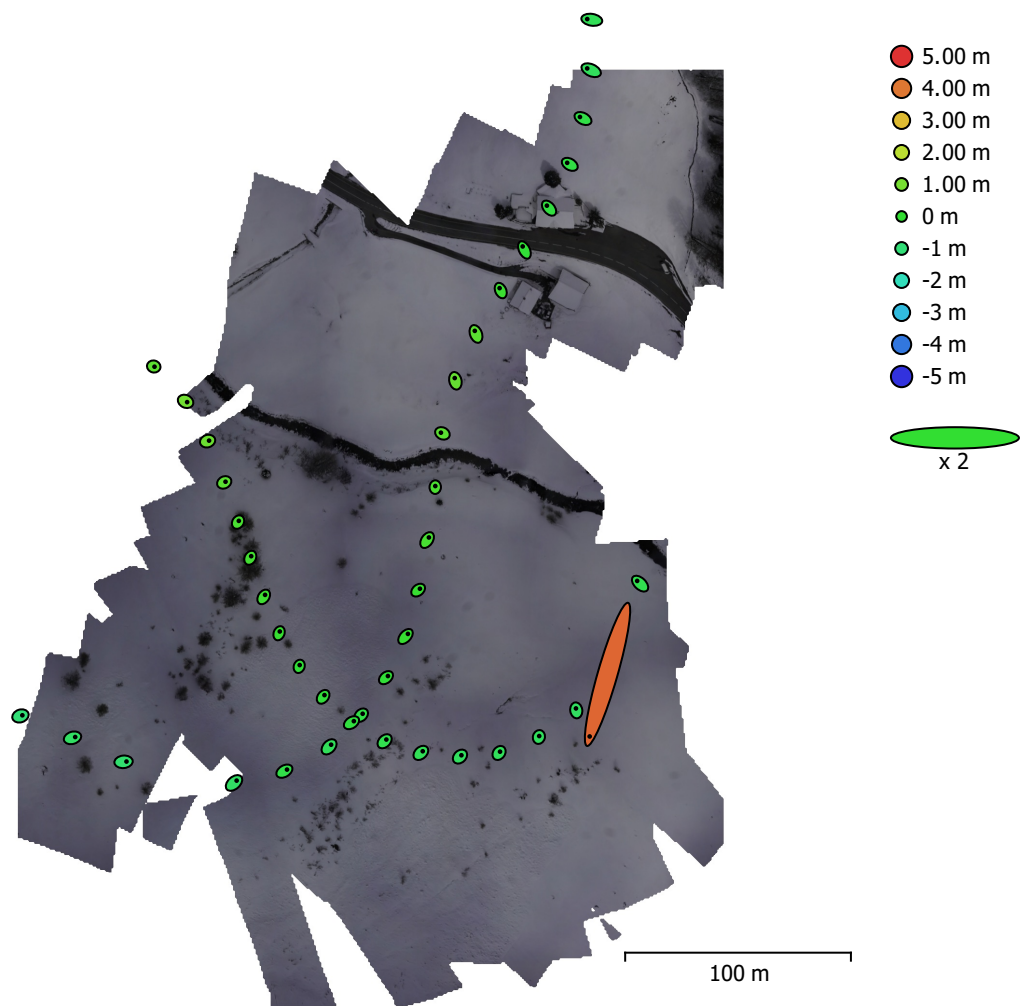

Fig. 3. Camera locations and error estimates.

Z error is represented by ellipse color. X,Y errors are represented by ellipse shape.  
Estimated camera locations are marked with a black dot.

| X error (m) | Y error (m) | Z error (m) | XY error (m) | Total error (m) |
|-------------|-------------|-------------|--------------|-----------------|
| 1.50964     | 4.36402     | 0.833705    | 4.61775      | 4.69241         |

Table 3. Average camera location error.

X - Longitude, Y - Latitude, Z - Altitude.

# Digital Elevation Model

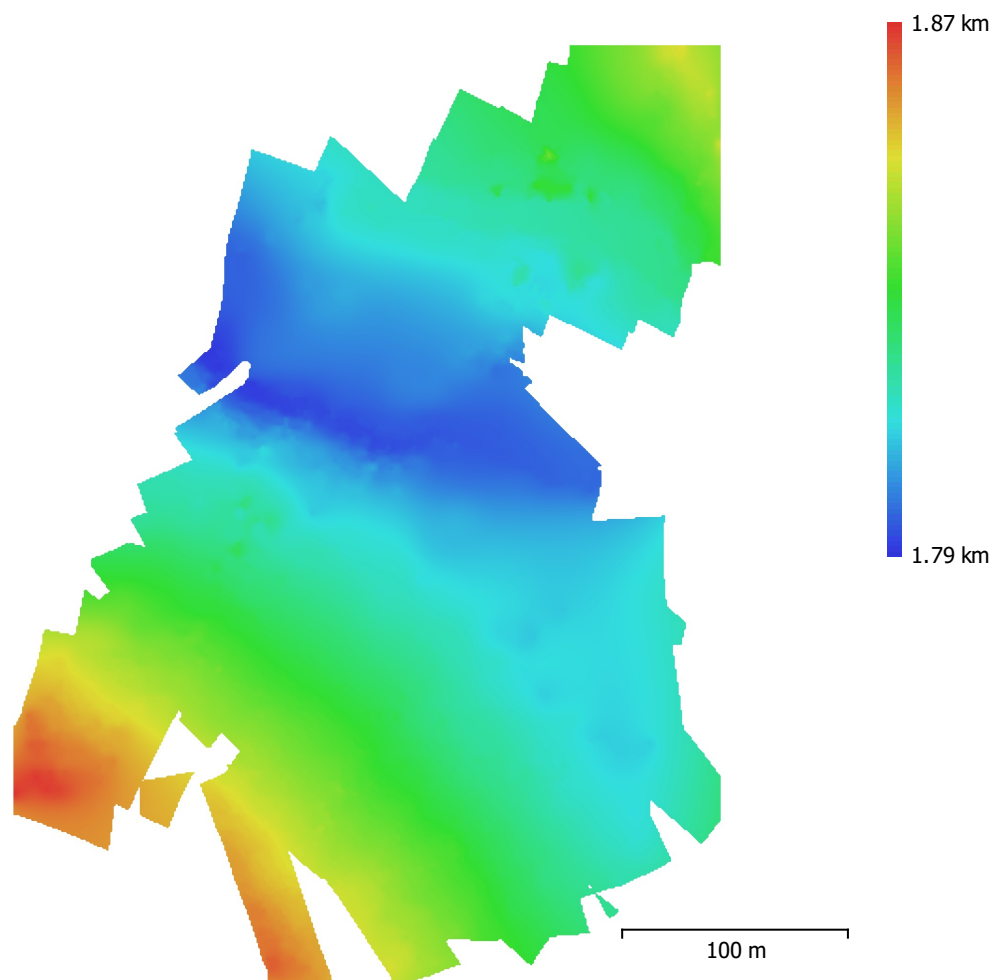

Fig. 4. Reconstructed digital elevation model.

Resolution: 83.0 cm/pix  
Point density: 1.45 points/m<sup>2</sup>

# Processing Parameters

## General

|                   |                     |
|-------------------|---------------------|
| Images            | 67                  |
| Aligned images    | 41                  |
| Coordinate system | WGS 84 (EPSG::4326) |
| Rotation angles   | Yaw, Pitch, Roll    |

## Tie Points

|                                |                        |
|--------------------------------|------------------------|
| Points                         | 28,404 of 42,829       |
| RMS reprojection error         | 0.169908 (2.00008 pix) |
| Max reprojection error         | 0.520625 (41.1745 pix) |
| Mean key point size            | 11.6725 pix            |
| Point colors                   | 3 bands, uint8         |
| Key points                     | No                     |
| Average tie point multiplicity | 2.66798                |

## Alignment parameters

|                               |                     |
|-------------------------------|---------------------|
| Accuracy                      | High                |
| Generic preselection          | No                  |
| Reference preselection        | No                  |
| Key point limit               | 40,000              |
| Key point limit per Mpx       | 1,000               |
| Tie point limit               | 4,000               |
| Exclude stationary tie points | No                  |
| Guided image matching         | No                  |
| Adaptive camera model fitting | No                  |
| Matching time                 | 30 seconds          |
| Matching memory usage         | 1.41 GB             |
| Alignment time                | 57 seconds          |
| Alignment memory usage        | 97.47 MB            |
| Date created                  | 2024:08:08 10:59:19 |
| Software version              | 2.1.2.18358         |
| File size                     | 2.52 MB             |

## DEM

|                   |                     |
|-------------------|---------------------|
| Size              | 377 x 500           |
| Resolution        | 83.0 cm/pix         |
| Coordinate system | WGS 84 (EPSG::4326) |

## Reconstruction parameters

|                  |                     |
|------------------|---------------------|
| Source data      | Tie points          |
| Interpolation    | Enabled             |
| Processing time  | 3 seconds           |
| Memory usage     | 6.14 MB             |
| Date created     | 2024:08:08 11:32:03 |
| Software version | 2.1.2.18358         |
| File size        | 552.88 KB           |

## Orthomosaic

|                   |                     |
|-------------------|---------------------|
| Size              | 15,648 x 14,252     |
| Resolution        | 2.46 cm/pix         |
| Coordinate system | WGS 84 (EPSG::4326) |
| Colors            | 3 bands, uint8      |
| Orthophotos       | 150.21 MB           |

## Reconstruction parameters

|               |        |
|---------------|--------|
| Blending mode | Mosaic |
|---------------|--------|

|                        |                      |
|------------------------|----------------------|
| Surface                | DEM                  |
| Enable hole filling    | Yes                  |
| Enable ghosting filter | No                   |
| Processing time        | 1 minutes 40 seconds |
| Memory usage           | 1.66 GB              |
| Date created           | 2024:08:08 11:33:19  |
| Software version       | 2.1.2.18358          |
| File size              | 211.46 MB            |

#### **System**

|                  |                                |
|------------------|--------------------------------|
| Software name    | Agisoft Metashape Professional |
| Software version | 2.2.0 build 19890              |
| OS               | Windows 64 bit                 |
| RAM              | 31.72 GB                       |
| CPU              | Intel(R) Core(TM) i9-14900K    |
| GPU(s)           | NVIDIA GeForce RTX 4060        |
