# Supplementary material for: Autonomous and efficient large-scale snow avalanche monitoring with an Unmanned Aerial System (UAS)
Source: Copernicus journal article supplement (doi:10.5194/nhess-26-411-2026), 2026-01-22
Supplement: Supplementary file 3 [file CoveragePlanning_full_report.pdf › Supplementary/CoveragePlanning_full_report.pdf]

# Coverage Planning Full dataset

Processing Report  
29 August 2025

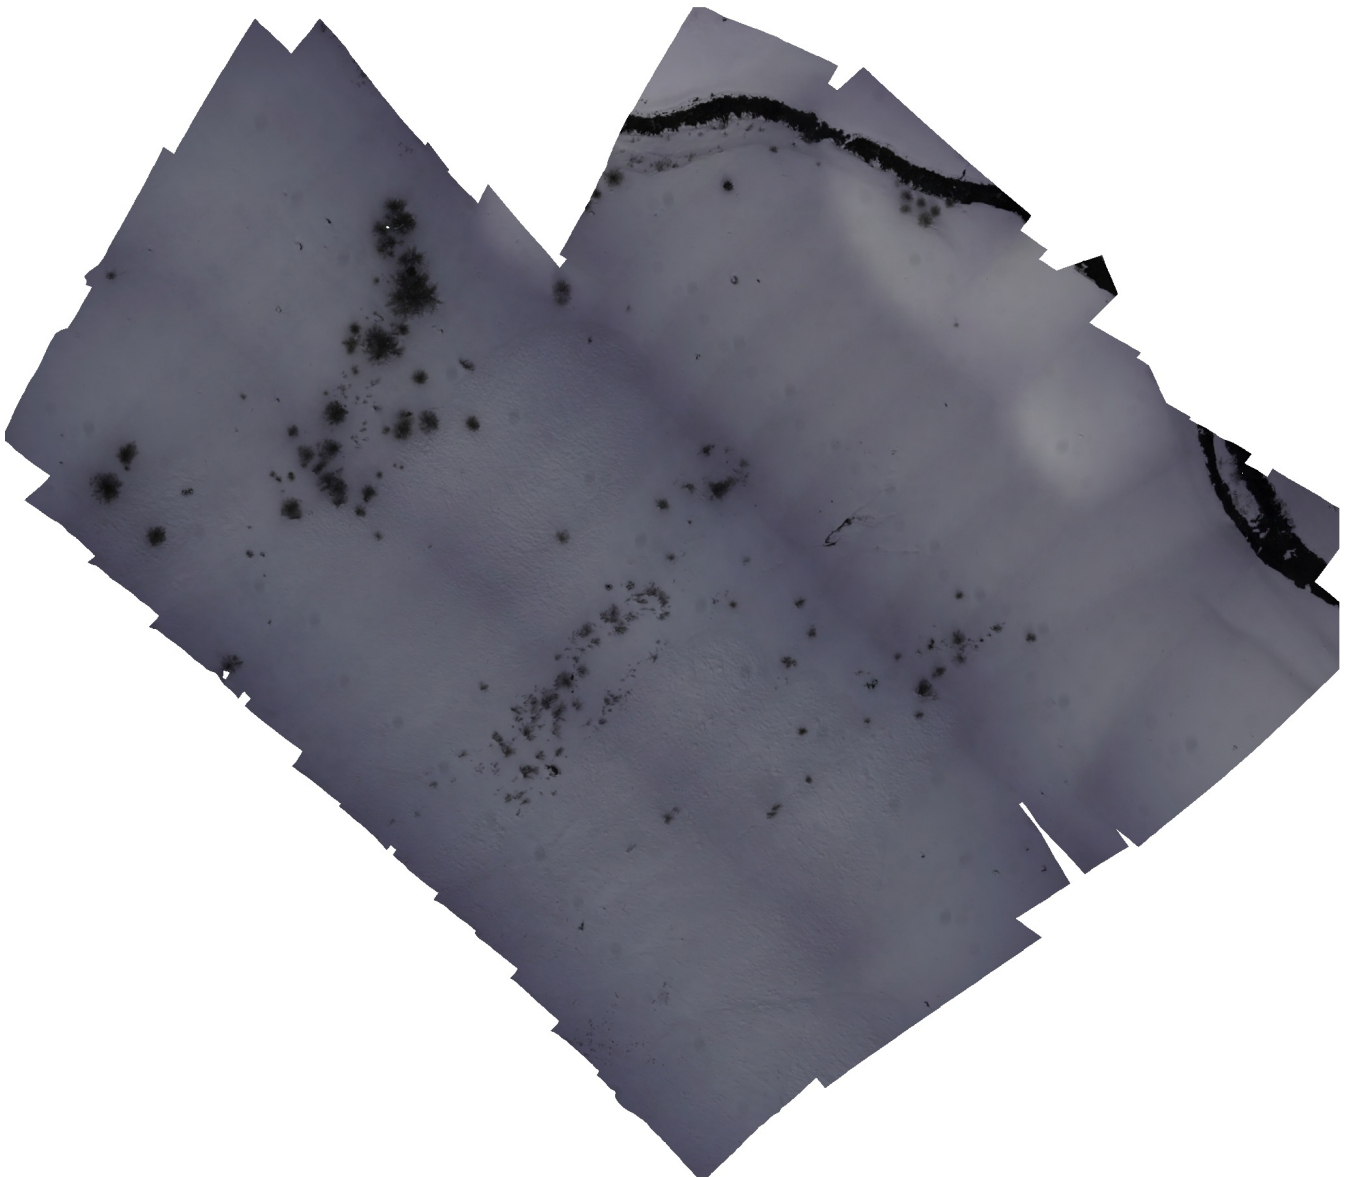

# Survey Data

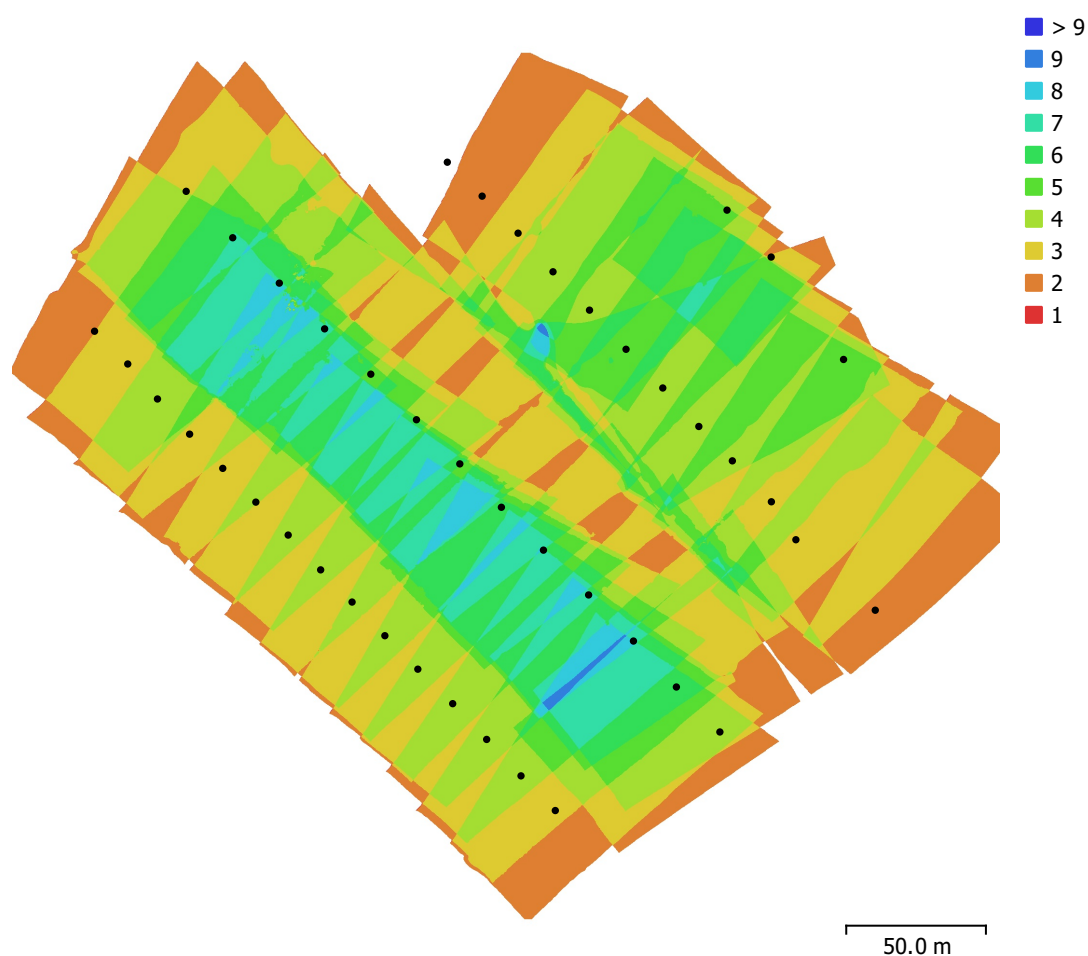

Fig. 1. Camera locations and image overlap.

|                    |                        |                     |          |
|--------------------|------------------------|---------------------|----------|
| Number of images:  | 47                     | Camera stations:    | 43       |
| Flying altitude:   | 93.7 m                 | Tie points:         | 28,684   |
| Ground resolution: | 1.03 cm/pix            | Projections:        | 69,756   |
| Coverage area:     | 0.0632 km <sup>2</sup> | Reprojection error: | 1.75 pix |

| Camera Model             | Resolution  | Focal Length | Pixel Size     | Precalibrated |
|--------------------------|-------------|--------------|----------------|---------------|
| ILCE-7RM4, FE 35mm F2... | 9504 x 6336 | 35 mm        | 3.79 x 3.79 μm | No            |

Table 1. Cameras.

# Camera Calibration

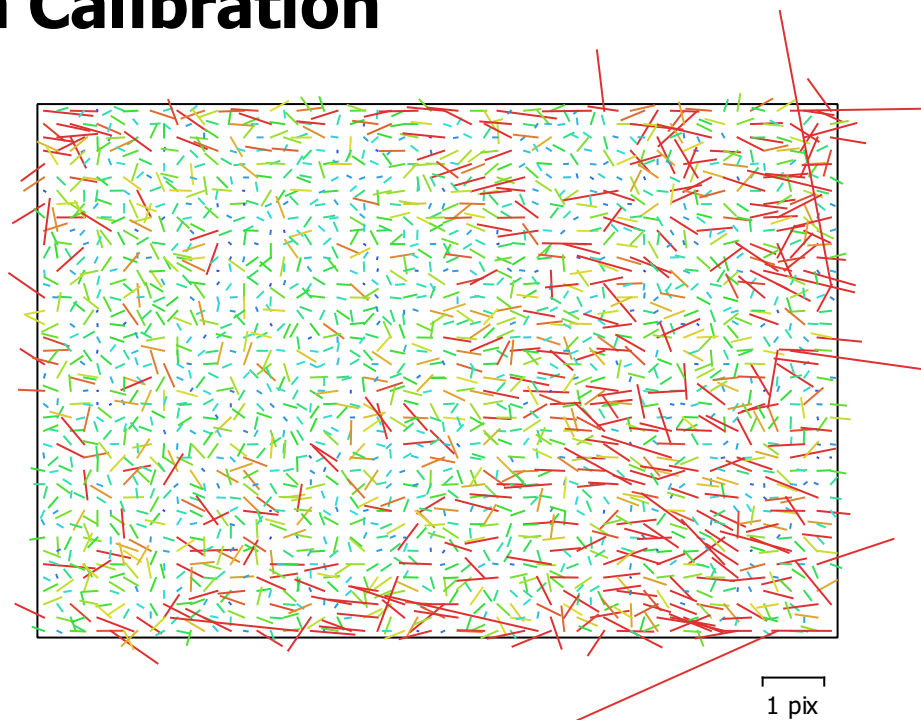

Fig. 2. Image residuals for ILCE-7RM4, FE 35mm F2.8 ZA (35mm).

## ILCE-7RM4, FE 35mm F2.8 ZA (35mm)

47 images

|       |             |              |                |
|-------|-------------|--------------|----------------|
| Type  | Resolution  | Focal Length | Pixel Size     |
| Frame | 9504 x 6336 | 35 mm        | 3.79 x 3.79 μm |

|    | Value        | Error   | F    | Cx    | Cy    | K1    | K2    | K3    | P1    | P2    |
|----|--------------|---------|------|-------|-------|-------|-------|-------|-------|-------|
| F  | 9528.84      | 6.4     | 1.00 | -0.26 | -0.33 | 0.65  | -0.21 | -0.10 | -0.42 | -0.42 |
| Cx | -35.9425     | 1.3     |      | 1.00  | 0.26  | -0.18 | 0.12  | -0.03 | 0.11  | 0.14  |
| Cy | -20.6094     | 1.6     |      |       | 1.00  | -0.17 | 0.07  | 0.03  | 0.13  | 0.57  |
| K1 | 0.0544619    | 0.00058 |      |       |       | 1.00  | -0.74 | 0.49  | -0.42 | -0.36 |
| K2 | -0.242295    | 0.0024  |      |       |       |       | 1.00  | -0.93 | 0.10  | 0.04  |
| K3 | 0.0250792    | 0.0044  |      |       |       |       |       | 1.00  | 0.03  | 0.09  |
| P1 | 0.000589026  | 3.5e-05 |      |       |       |       |       |       | 1.00  | 0.32  |
| P2 | -0.000891449 | 4.8e-05 |      |       |       |       |       |       |       | 1.00  |

Table 2. Calibration coefficients and correlation matrix.

# Camera Locations

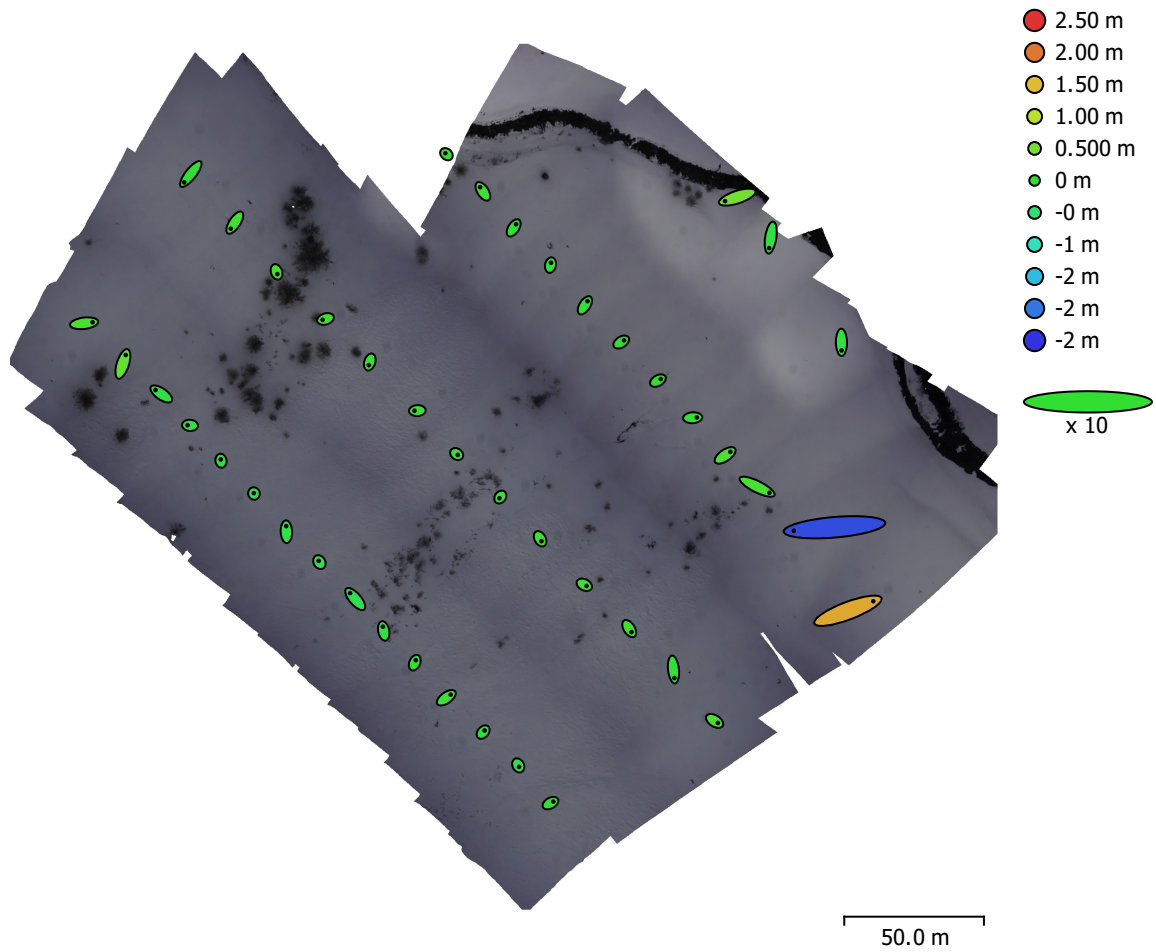

Fig. 3. Camera locations and error estimates.

Z error is represented by ellipse color. X,Y errors are represented by ellipse shape.

Estimated camera locations are marked with a black dot.

| X error (cm) | Y error (cm) | Z error (cm) | XY error (cm) | Total error (cm) |
|--------------|--------------|--------------|---------------|------------------|
| 59.3939      | 31.5394      | 45.6011      | 67.2486       | 81.2516          |

Table 3. Average camera location error.

X - Longitude, Y - Latitude, Z - Altitude.

# Digital Elevation Model

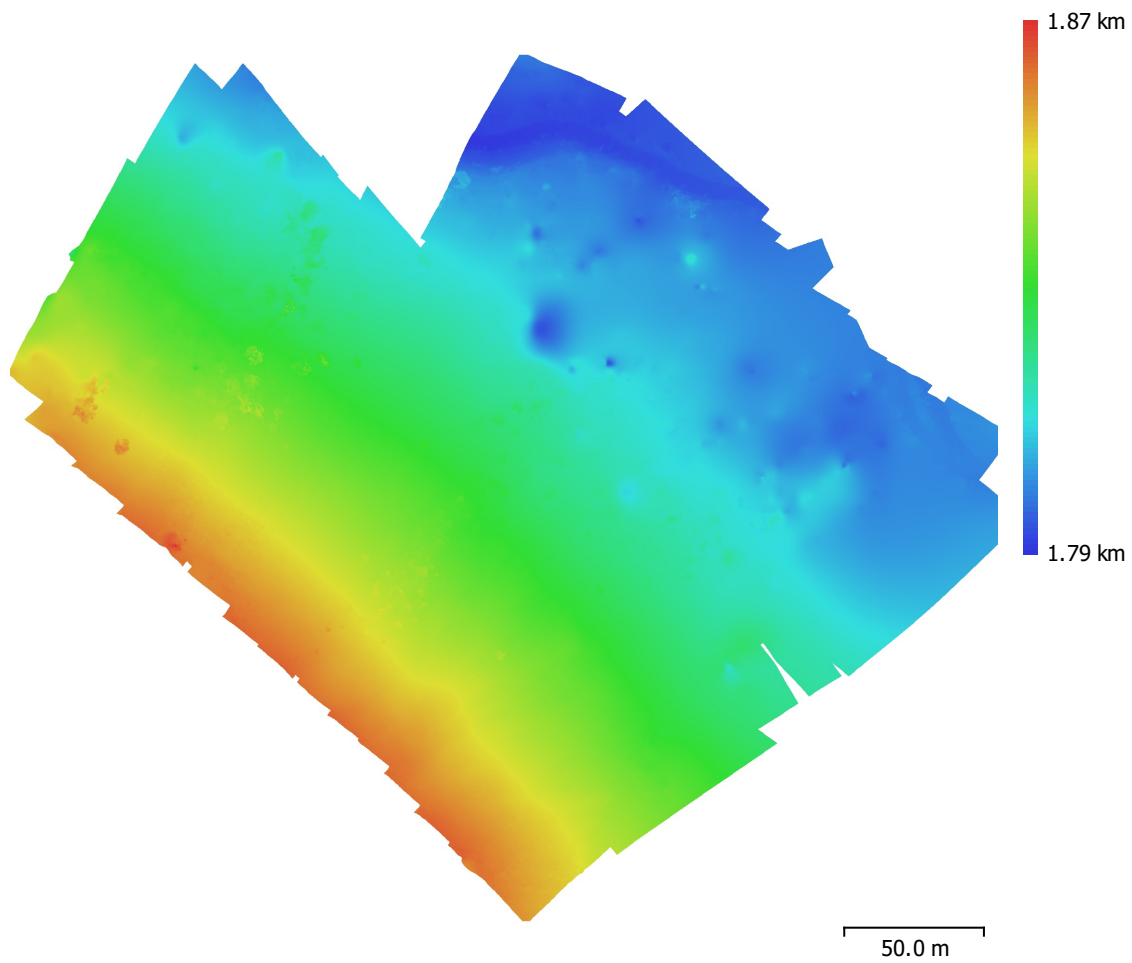

Fig. 4. Reconstructed digital elevation model.

Resolution: 2.06 cm/pix  
Point density: 0.236 points/cm<sup>2</sup>

# Processing Parameters
