# Supplementary material for: Autonomous and efficient large-scale snow avalanche monitoring with an Unmanned Aerial System (UAS)
Source: Copernicus journal article supplement (doi:10.5194/nhess-26-411-2026), 2026-01-22
Supplement: Supplementary file [file nhess-26-411-2026-supplement-title-page.pdf › nhess-26-411-2026-supplement-title-page.pdf]

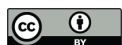

## *Supplement of*

# **Autonomous and efficient large-scale snow avalanche monitoring with an Unmanned Aerial System (UAS)**

**Jaeyoung Lim et al.**

*Correspondence to:* Jaeyoung Lim (jalim@ethz.ch)

- nhess-26-411-2026-supplement-title-page.pdf
- Supplementary
  - ActivePlanning\_full\_report.pdf
  - ActivePlanning\_partial\_report.pdf
  - CoveragePlanning\_full\_report.pdf

The copyright of individual parts of the supplement might differ from the article licence.
